# Supplementary material for: Phylogenetic Position of Shiraia-Like Endophytes on Bamboos and the Diverse Biosynthesis of Hypocrellin and Hypocrellin Derivatives
Source: MDPI journal article supplement (doi:10.3390/jof7070563), 2021-07-14
Supplement: s1 [file s1]

**Table S1.** HPLC-DAD-MS data of perylenequinonoid compounds in this study.

| Compound | Rt (min) | [M-H] <sup>-</sup> m/z | Molecular Weight |
|----------|----------|------------------------|------------------|
| HA       | 40.3     | 545.1441               | 546.52           |
| HB       | 45.1     | 527.1368               | 528.51           |
| SA       | 36.6     | 545.1443               | 546.52           |
| EA       | 38.3     | 543.1443               | 544.51           |
| EB       | 25.4     | 545.1450               | 546.52           |
| EC       | 21.7     | 547.1568               | 548.54           |
